# Supplementary material
Source: ML conference proceedings conference paper supplement (https://proceedings.mlr.press/v48/lei16.html)
Supplement: Supplementary file 1 [file lei16-supp.pdf]

# Power of Ordered Hypotheses Testing (Supplementary Material)

Lihua Lei

Department of Statistics, University of California, Berkeley

William Fithian

Department of Statistics, University of California, Berkeley

## Appendix A: Proof of Theorem 1

Let  $\mathcal{F}_k$  be the  $\sigma$  field generated by all non-null pvalues as well as  $\{I(p_i \leq s), I(p_i > \lambda) : i \geq k\}$ . Then  $\hat{k}$  is a stopping time with respect to the backward filtration  $\mathcal{F}_n \subset \mathcal{F}_{n-1} \subset \dots \subset \mathcal{F}_1$ . Recall that  $V(s, k) = \sum_{i \leq k, i \notin \mathcal{H}_0} I(p_i \leq s)$  and  $R(s, k) = \sum_{i \leq k} I(p_i \leq s)$ , it holds that

$$\begin{aligned} \text{FDP} &= \frac{V(s, \hat{k})}{R(s, \hat{k}) \vee 1} = \frac{V(s, \hat{k})}{1 + \sum_{i \leq \hat{k}} I(p_i > \lambda)} \cdot \frac{1 + \sum_{i \leq \hat{k}} I(p_i > \lambda)}{R(s, \hat{k}) \vee 1} \\ &\leq \frac{V(s, \hat{k})}{1 + \sum_{i \in \mathcal{H}_0, i \leq \hat{k}} I(p_i > \lambda)} \cdot \frac{1 + \sum_{i \leq \hat{k}} I(p_i > \lambda)}{R(s, \hat{k}) \vee 1} \\ &\leq \frac{V(s, \hat{k})}{1 + \sum_{i \in \mathcal{H}_0, i \leq \hat{k}} I(p_i > \lambda)} \cdot \frac{1 - \lambda}{s} q. \end{aligned}$$

Let

$$M(k) = \frac{V(s, k)}{1 + \sum_{i \in \mathcal{H}_0, i \leq k} I(p_i > \lambda)}.$$

Now we prove that  $M(k)$  is a backward martingale with respect to the filtration  $\{\mathcal{F}_k : k = n, n-1, \dots, 1\}$ . In fact, let

$$V^+(k) = V(s, k) = \sum_{i \in \mathcal{H}_0, i \leq k} I(p_i \leq s), \quad V^-(k) = \sum_{i \in \mathcal{H}_0, i \leq k} I(p_i > \lambda).$$

The notations here is comparable to Barber and Candès (2015). Then

$$M(k) = \frac{V^+(k)}{1 + V^-(k)}.$$

If  $n \in \mathcal{H}_0^c$  is non-null, then  $M(k-1) = M(k)$ . If  $n$  is null, let  $(I_1, I_2) = (I(p_k \leq s), I(p_k > \lambda))$ . Since  $\{p_i : i \in \mathcal{H}_0\}$  are i.i.d., by symmetry,

$$\begin{aligned} P(I_1 = 1, I_2 = 0 | \mathcal{F}_k) &= \frac{V^+(k)}{|\mathcal{H}_0 \cap \{1, \dots, k\}|}, \quad P(I_1 = 0, I_2 = 1 | \mathcal{F}_k) = \frac{V^-(k)}{|\mathcal{H}_0 \cap \{1, \dots, k\}|}, \\ P(I_1 = 0, I_2 = 0 | \mathcal{F}_k) &= 1 - \frac{V^+(k) + V^-(k)}{|\mathcal{H}_0 \cap \{1, \dots, k\}|}. \end{aligned}$$

Thus,

$$\begin{aligned}
& \mathbb{E}(M(k-1)|\mathcal{F}_k) \\
&= \frac{V^+(k)-1}{1+V^-(k)} \cdot \frac{V^+(k)}{|\mathcal{H}_0 \cap \{1, \dots, k\}|} + \frac{V^+(k)}{V^-(k) \vee 1} \cdot \frac{V^-(k)}{|\mathcal{H}_0 \cap \{1, \dots, k\}|} + \frac{V^+(k)}{1+V^-(k)} \cdot \left(1 - \frac{V^+(k)+V^-(k)}{|\mathcal{H}_0 \cap \{1, \dots, k\}|}\right) \\
&\leq \frac{V^+(k)-1}{1+V^-(k)} \cdot \frac{V^+(k)}{|\mathcal{H}_0 \cap \{1, \dots, k\}|} + \frac{V^+(k)}{|\mathcal{H}_0 \cap \{1, \dots, k\}|} + \frac{V^+(k)}{1+V^-(k)} \cdot \left(1 - \frac{V^+(k)+V^-(k)}{|\mathcal{H}_0 \cap \{1, \dots, k\}|}\right) \\
&= \frac{V^+(k)}{1+V^-(k)} \cdot \frac{V^+(k)+V^-(k)}{|\mathcal{H}_0 \cap \{1, \dots, k\}|} + \frac{V^+(k)}{1+V^-(k)} \cdot \left(1 - \frac{V^+(k)+V^-(k)}{|\mathcal{H}_0 \cap \{1, \dots, k\}|}\right) \\
&= \frac{V^+(k)}{1+V^-(k)} = M(k).
\end{aligned}$$

In summary,

$$\mathbb{E}(M(k-1)|\mathcal{F}_k) \leq M(k)$$

which shows that  $M_k$  is a backward super-martingale. Notice that  $M(k) \leq n$  is bounded, it follows from optimal stopping time theorem that

$$\mathbb{E}M(\hat{k}) \leq \mathbb{E}M(n) = \mathbb{E} \left( \frac{\sum_{i \in \mathcal{H}_0} I(p_i \leq s)}{1 + \sum_{i \in \mathcal{H}_0} I(p_i > \lambda)} \right).$$

It is easy to see that

$$\mathcal{L} \left( \sum_{i \in \mathcal{H}_0} I(p_i \leq s) \middle| \sum_{i \in \mathcal{H}_0} I(p_i \leq \lambda) = m \right) = \text{Binom} \left( m, \frac{F_1(s)}{F_1(\lambda)} \right)$$

and hence

$$\begin{aligned}
\mathbb{E} \left( \frac{\sum_{i \in \mathcal{H}_0} I(p_i \leq s)}{1 + \sum_{i \in \mathcal{H}_0} I(p_i > \lambda)} \right) &= \mathbb{E} \left( \mathbb{E} \left( \frac{\sum_{i \in \mathcal{H}_0} I(p_i \leq s)}{1 + \sum_{i \in \mathcal{H}_0} I(p_i > \lambda)} \middle| \sum_{i \in \mathcal{H}_0} I(p_i \leq \lambda) \right) \right) \\
&= \frac{F_1(s)}{F_1(\lambda)} \cdot \mathbb{E} \left( \frac{\sum_{i \in \mathcal{H}_0} I(p_i \leq \lambda)}{1 + \sum_{i \in \mathcal{H}_0} I(p_i > \lambda)} \right) \\
&\leq \frac{F_1(s)}{1 - F_1(\lambda)}
\end{aligned}$$

where the last assertion follows from the fact that for any binomial random variable  $X \sim N(r, p)$ ,

$$\mathbb{E} \frac{X}{r+1-X} \leq \frac{s}{1-\lambda}. \quad (1)$$

In fact,

$$\begin{aligned}
\mathbb{E} \frac{X}{r+1-X} &= \sum_{i=0}^n \frac{i}{r+1-i} \cdot \binom{r}{i} p^i (1-p)^{r-i} \\
&= \sum_{i=1}^r \frac{r!}{(i-1)!(r+1-i)!} \cdot p^i (1-p)^{r-i} \\
&= \frac{p}{1-p} \cdot \sum_{i=0}^{r-1} \binom{r}{i} p^i (1-p)^{r-i} \\
&\leq \frac{p}{1-p}.
\end{aligned}$$

Since  $p_i \geq U[0, 1]$ , it holds that  $F_1(s) \leq s$  and  $F_1(\lambda) \leq \lambda$ . Thus, by Optional Stopping Theorem,

$$\mathbb{E}M(\hat{k}) \leq \mathbb{E}M(n) = \mathbb{E} \left( \frac{\sum_{i \in \mathcal{H}_0} I(p_i \leq s)}{1 + \sum_{i \in \mathcal{H}_0} I(p_i > \lambda)} \right) \leq \frac{s}{1-\lambda}.$$

and hence

$$\text{FDR}(\hat{k}) = \mathbb{E} \left( \frac{V(s, \hat{k})}{R(s, \hat{k}) \vee 1} \right) \leq \frac{s}{1-\lambda} \cdot \frac{1-\lambda}{s} q = q.$$

## Appendix B: Proof of Theorem 2

**Lemma 1.** Let  $B_i \sim \text{Ber}(1, p_i)$  are independent Bernoulli random variables. Then for some positive integer  $r$  and positive real number  $\nu$ ,

$$P\left(\sup_{k \geq r} \left| \frac{\sum_{i=1}^k (B_i - p_i)}{k} \right| > \nu\right) \leq \left(2 + \frac{4}{\nu^2}\right) e^{-\frac{r\nu^2}{2}}.$$

*Proof.* Notice that  $B_i - p_i$  is subgaussian with parameter 1, we have

$$P\left(\left| \frac{\sum_{i=1}^k (B_i - p_i)}{k} \right| > \nu\right) \leq 2e^{-\frac{k\nu^2}{2}}.$$

Then

$$P\left(\sup_{k \geq r} \left| \frac{\sum_{i=1}^k (B_i - p_i)}{k} \right| > \nu\right) \leq 2 \sum_{k \geq r} e^{-\frac{k\nu^2}{2}} \leq \frac{2e^{-\frac{r\nu^2}{2}}}{1 - e^{-\frac{\nu^2}{2}}} \leq \left(2 + \frac{4}{\nu^2}\right) e^{-\frac{r\nu^2}{2}},$$

where the last step uses the fact that

$$1 - e^{-\frac{\nu^2}{2}} = 1 - \frac{1}{e^{\frac{\nu^2}{2}}} \geq 1 - \frac{1}{1 + \frac{\nu^2}{2}} = \frac{1}{1 + \frac{\nu^2}{2}}.$$

□

**Proposition 1.** For a VCT model with instantaneous non-null probability  $\pi(t)$ ,

$$\max_{k=a_n, a_n+1, \dots, n} \left| \frac{\#\{i \leq k : i \notin \mathcal{H}_0\}}{k} - \Pi\left(\frac{k}{n}\right) \right| \leq \epsilon_n \quad (2)$$

holds with probability converging to 1 for properly chosen sequences  $\{a_n\}$  and  $\{\epsilon_n\}$  such that

$$a_n/n \rightarrow 0, \quad a_n \rightarrow \infty, \quad \epsilon_n \rightarrow 0.$$

In particular we can set  $a_n = \lceil (\log n)^2 \rceil$  and  $\epsilon_n = \frac{1}{\sqrt{\log n}}$ .

**Remark 1.** The condition (12) of Li and Barber (2015) sets  $a_n = 0$ , which cannot be true. As will be shown later, a growing sequence  $a_n$  suffices for our asymptotic analysis.

**Proof of Proposition 1.** Let  $P_n(x)$  be the step function with  $P_n(x) = \frac{\lfloor nx \rfloor}{n}$ . For any given  $k$ ,

$$\begin{aligned} & \left| \frac{\#\{i \leq k : i \notin \mathcal{H}_0\}}{k} - \Pi\left(\frac{k}{n}\right) \right| \\ & \leq \left| \frac{\sum_{i=1}^k (I(i \notin \mathcal{H}_0) - \pi(\frac{i}{n}))}{k} \right| + \left| \int_0^{\frac{k}{n}} \pi(x) d(P_n(x) - x) \right| \\ & \leq \left| \frac{\sum_{i=1}^k (I(i \notin \mathcal{H}_0) - \pi(\frac{i}{n}))}{k} \right| + \frac{1}{n} \cdot \int_0^{\frac{k}{n}} \pi(x) dx \\ & \leq \left| \frac{\sum_{i=1}^k (I(i \notin \mathcal{H}_0) - \pi(\frac{i}{n}))}{k} \right| + \frac{1}{n}. \end{aligned}$$

Let  $\nu_n = \epsilon_n - \frac{1}{n}$ . By Lemma 1,

$$P\left(\sup_{k \geq a_n} \left| \frac{\sum_{i=1}^k (I(i \notin \mathcal{H}_0) - \pi(\frac{i}{n}))}{k} \right| > \nu_n\right) \leq \left(2 + \frac{4}{\nu_n^2} e^{-\frac{a_n \nu_n^2}{2}}\right) \triangleq \delta_n \rightarrow 0.$$

Thus with probability  $1 - \delta_n$ ,

$$\sup_{k \geq a_n} \left| \frac{\#\{i \leq k : i \notin \mathcal{H}_0\}}{k} - \Pi\left(\frac{k}{n}\right) \right| \leq \epsilon_n.$$

□

**Proof of Theorem 2.** Note that when  $F_1$  is strictly concave,

$$\frac{1 - F_1(\lambda)}{1 - \lambda} = \frac{F_1(1) - F_1(\lambda)}{1 - \lambda} \leq \frac{F_1(1) - F_1(0)}{1 - 0} = 1 \leq \frac{F_1(s) - F_1(0)}{s - 0} = \frac{F_1(s)}{s}.$$

We will use this result throughout the proof. Select  $a_n = \lceil (\log n)^2 \rceil$  and  $\epsilon_n = \frac{1}{\sqrt{\log n}}$  and let

$$\delta_n \triangleq \left(2 + \frac{4}{\nu_n^2}\right) \cdot e^{-\frac{a_n \nu_n^2}{2}}.$$

Then  $\delta_n \rightarrow 0$  and by Lemma 1, with probability  $1 - 2\delta_n$ ,

$$\sup_{k \geq a_n} \left| \frac{\sum_{i=1}^k I(p_i > \lambda)}{k} - \frac{\sum_{i=1}^k \mathbb{E}I(p_i > \lambda)}{k} \right| \leq \nu_n,$$

and

$$\sup_{k \geq a_n} \left| \frac{\sum_{i=1}^k I(p_i \leq s)}{k} - \frac{\sum_{i=1}^k \mathbb{E}I(p_i \leq s)}{k} \right| \leq \nu_n.$$

On the other hand, by Proposition 1,

$$\begin{aligned} & \left| \frac{\sum_{i=1}^k \mathbb{E}I(p_i > \lambda)}{k} - \left( \left[1 - \Pi\left(\frac{k}{n}\right)\right] (1 - \lambda) + \Pi\left(\frac{k}{n}\right) (1 - F_1(\lambda)) \right) \right| \\ &= \left| \frac{\#\{i \leq k : i \notin \mathcal{H}_0\}}{k} - \Pi\left(\frac{k}{n}\right) \right| \cdot |F_1(\lambda) - \lambda| \leq \epsilon_n. \end{aligned}$$

Similarly,

$$\left| \frac{\sum_{i=1}^k \mathbb{E}I(p_i \leq s)}{k} - \left( \left[1 - \Pi\left(\frac{k}{n}\right)\right] s + \Pi\left(\frac{k}{n}\right) F_1(s) \right) \right| \leq \epsilon_n.$$

These imply that with probability  $1 - 2\delta_n$ , it holds uniformly for  $k \geq a_n$  that

$$\begin{aligned} \widehat{\text{FDP}}_{AS}(k) &\leq \frac{[1 - \Pi(\frac{k}{n})] (1 - \lambda) + \Pi(\frac{k}{n}) (1 - F_1(\lambda)) + \epsilon_n + \nu_n + \frac{1}{a_n}}{[1 - \Pi(\frac{k}{n})] s + \Pi(\frac{k}{n}) F_1(s) - \epsilon_n - \nu_n} \\ \Rightarrow \frac{1 + \sum_{i=1}^k I(p_i > \lambda)}{1 \vee \sum_{i=1}^k I(p_i \leq s)} &- \frac{[1 - \Pi(\frac{k}{n})] (1 - \lambda) + \Pi(\frac{k}{n}) (1 - F_1(\lambda))}{[1 - \Pi(\frac{k}{n})] s + \Pi(\frac{k}{n}) F_1(s)} \\ &\leq \left( \epsilon_n + \nu_n + \frac{1}{a_n} \right) \cdot \frac{[1 - \Pi(\frac{k}{n})] (1 - \lambda) + \Pi(\frac{k}{n}) (1 - F_1(\lambda)) + [1 - \Pi(\frac{k}{n})] s + \Pi(\frac{k}{n}) F_1(s)}{([1 - \Pi(\frac{k}{n})] s + \Pi(\frac{k}{n}) F_1(s) - \epsilon_n - \nu_n)^2} \\ &\leq \left( \epsilon_n + \nu_n + \frac{1}{a_n} \right) \cdot \frac{1 - F_1(\lambda) + F_1(s)}{(s - \epsilon_n - \nu_n)^2} \end{aligned}$$

and

$$\begin{aligned} \widehat{\text{FDP}}_{AS}(k) &\geq \frac{[1 - \Pi(\frac{k}{n})] (1 - \lambda) + \Pi(\frac{k}{n}) (1 - F_1(\lambda)) - \epsilon_n - \nu_n + \frac{1}{a_n}}{[1 - \Pi(\frac{k}{n})] s + \Pi(\frac{k}{n}) F_1(s) + \epsilon_n + \nu_n} \\ \Rightarrow \frac{1 + \sum_{i=1}^k I(p_i > \lambda)}{1 \vee \sum_{i=1}^k I(p_i \leq s)} &- \frac{[1 - \Pi(\frac{k}{n})] (1 - \lambda) + \Pi(\frac{k}{n}) (1 - F_1(\lambda))}{[1 - \Pi(\frac{k}{n})] s + \Pi(\frac{k}{n}) F_1(s)} \\ &\geq -(\epsilon_n + \nu_n) \cdot \frac{[1 - \Pi(\frac{k}{n})] (1 - \lambda) + \Pi(\frac{k}{n}) (1 - F_1(\lambda)) + [1 - \Pi(\frac{k}{n})] s + \Pi(\frac{k}{n}) F_1(s)}{([1 - \Pi(\frac{k}{n})] s + \Pi(\frac{k}{n}) F_1(s))^2} \\ &\geq -(\epsilon_n + \nu_n) \cdot \frac{1 - F_1(\lambda) + F_1(s)}{s^2} \end{aligned}$$

Since  $\epsilon_n, \nu_n \rightarrow 0$ , we have

$$\lim_{n \rightarrow \infty} \sup_{k \geq a_n} \left| \widehat{\text{FDP}}_{AS}(k) - \frac{[1 - \Pi(\frac{k}{n})] (1 - \lambda) + \Pi(\frac{k}{n}) (1 - F_1(\lambda))}{[1 - \Pi(\frac{k}{n})] s + \Pi(\frac{k}{n}) F_1(s)} \right| = 0 \quad a.s. \quad (3)$$

Recall that

$$\text{FDR}_{AS}^*(t) = \frac{1 - \Pi(t) + \Pi(t) \frac{1 - F_1(\lambda)}{1 - \lambda}}{1 - \Pi(t) + \Pi(t) \frac{F_1(s)}{s}},$$

then

$$\frac{d\text{FDR}_{AS}^*(t)}{d\Pi(t)} = \frac{\frac{F_1(s)}{s} - \frac{1 - F_1(\lambda)}{1 - \lambda}}{\left(\frac{F_1(s)}{s} - 1\right) \left(1 + \left(\frac{F_1(s)}{s} - 1\right)\Pi(t)\right)} \leq \frac{\frac{F_1(s)}{s} - \frac{1 - F_1(\lambda)}{1 - \lambda}}{\frac{F_1(s)}{s} - 1} \triangleq L$$

and hence  $\text{FDR}_{AS}^*(t)$  is  $LL_{\Pi}$ Lipschitz where  $L_{\Pi}$  is the Lipschitz constant of  $\Pi$ . This entails that

$$\sup_{k \leq n} \sup_{|t - \frac{k}{n}| < \frac{1}{n}} \left| \text{FDR}_{AS}^*(t) - \text{FDR}_{AS}^*\left(\frac{k}{n}\right) \right| \leq \frac{LL_{\Pi}}{n}. \quad (4)$$

(4) together with (3) implies that

$$\lim_{n \rightarrow \infty} \sup_{t \geq a_n/n} |\widehat{\text{FDP}}_{AS}(\lfloor nt \rfloor) - \text{FDR}_{AS}^*(t)| = 0 \quad a.s. \quad (5)$$

Since  $a_n/n \rightarrow 0$ , for any  $c > 0$ ,

$$\lim_{n \rightarrow \infty} \sup_{t \geq c} |\widehat{\text{FDP}}_{AS}(\lfloor nt \rfloor) - \text{FDR}_{AS}^*(t)| = 0 \quad a.s. \quad (6)$$

If  $\text{FDR}_{AS}^*(0) \geq q$ , then for any  $c > 0$  and  $x \geq c$ ,  $\text{FDR}_{AS}^*(t) \geq \text{FDR}_{AS}^*(c) > \text{FDR}_{AS}^*(0) \geq q$ . (6) implies that

$$\liminf_{n \rightarrow \infty} \inf_{t \geq c} \widehat{\text{FDP}}_{AS}(\lfloor nt \rfloor) \geq \text{FDR}_{AS}^*(c) > q \quad a.s.$$

By definition,

$$\widehat{\text{FDP}}_{AS}(\hat{k}_{AS}) \leq q$$

and hence  $\hat{k}/n \leq c$  almost surely. This holds for arbitrary  $c > 0$ , therefore,  $\hat{k}/n \xrightarrow{a.s.} 0 = t_{AS}^*$ . In this case,

$$\text{Pow}_{AS} = \frac{\#\{i \leq \hat{k} : i \notin \mathcal{H}_0, p_i \leq s\}}{\#\{i \leq n : i \notin \mathcal{H}_0\}} \leq \frac{\hat{k}}{n} \cdot \frac{n}{\#\{i \leq n : i \notin \mathcal{H}_0\}} \xrightarrow{a.s.} 0$$

since  $\hat{k}/n \xrightarrow{a.s.} 0$  and

$$\frac{n}{\#\{i \leq n : i \notin \mathcal{H}_0\}} \xrightarrow{a.s.} \frac{1}{\Pi(1)} < \infty.$$

If  $\text{FDR}_{AS}^*(1) \leq q$ , similar to the above argument, we have

$$\limsup_{n \rightarrow \infty} \widehat{\text{FDP}}_{AS}(\lfloor n(1 - c) \rfloor) \leq \text{FDR}_{AS}^*(1 - c) < \text{FDR}_{AS}^*(1) \leq q$$

for arbitrary  $c > 0$ . This implies that  $\hat{k}/n \geq 1 - c$  almost surely. Thus,  $\hat{k}/n \xrightarrow{a.s.} 1 = t_{AS}^*$ . In this case,

$$\begin{aligned} \text{Pow}_{AS} &= \frac{\#\{i \leq \hat{k} : i \notin \mathcal{H}_0, p_i \leq s\}}{\#\{i \leq n : i \notin \mathcal{H}_0\}} \\ &= \frac{\#\{i \leq \hat{k} : i \notin \mathcal{H}_0, p_i \leq s\}}{\#\{i \leq \hat{k} : i \notin \mathcal{H}_0\}} \cdot \frac{\#\{i \leq \hat{k} : i \notin \mathcal{H}_0\}}{\hat{k}} \cdot \frac{\hat{k}}{n} \cdot \frac{n}{\#\{i \leq n : i \notin \mathcal{H}_0\}} \end{aligned} \quad (7)$$

Since  $\hat{k}/n \xrightarrow{a.s.} 1 > 0$ ,  $\hat{k} \geq a_n$  almost surely and hence

$$\Pi\left(\frac{\hat{k}}{n}\right) - \epsilon_n \geq \frac{\#\{i \leq \hat{k} : i \notin \mathcal{H}_0\}}{\hat{k}} \geq \Pi\left(\frac{\hat{k}}{n}\right) - \epsilon_n.$$

This implies that

$$\frac{\#\{i \leq \hat{k} : i \notin \mathcal{H}_0\}}{\hat{k}} \rightarrow \Pi(1) \quad a.s.$$

and as a byproduct, we know  $\#\{i \leq \hat{k} : i \notin \mathcal{H}_0\} \xrightarrow{a.s.} \infty$ . By Law of Large Number,

$$\frac{\#\{i \leq \hat{k} : i \notin \mathcal{H}_0, p_i \leq s\}}{\#\{i \leq \hat{k} : i \notin \mathcal{H}_0\}} \xrightarrow{a.s.} F_1(s).$$

Therefore,

$$\text{Pow}_{AS} \rightarrow \Pi(1) \cdot F_1(s) \cdot 1 \cdot \frac{1}{\Pi(1)} = F_1(s) \quad a.s.$$

If  $\text{FDR}_{AS}^*(0) < q < \text{FDR}_{AS}^*(1)$ , then  $t_{AS}^* = \text{FDR}_{AS}^{*-1}(q)$ . For any  $c > 0$ , (6) implies that

$$\limsup_{n \rightarrow \infty} \widehat{\text{FDP}}_{AS}(\lfloor n(t_{AS}^* - c) \rfloor) \leq \text{FDR}_{AS}^*(t_{AS}^* - c) < \text{FDR}_{AS}^*(t_{AS}^*) = q,$$

and

$$\liminf_{n \rightarrow \infty} \sup_{t \geq t_{AS}^* + c} \widehat{\text{FDP}}_{AS}(\lfloor nt \rfloor) \geq \text{FDR}_{AS}^*(t_{AS}^* + c) > \text{FDR}_{AS}^*(t_{AS}^*) = q.$$

Thus,

$$t_{AS}^* - c \leq \frac{\hat{k}}{n} \leq t_{AS}^* + c \quad a.s.$$

Since  $c$  is arbitrary, we have  $\hat{k}/n \xrightarrow{a.s.} t_{AS}^*$ . In this case, notice that  $\liminf_{n \rightarrow \infty} \hat{k}/n > 0$ , we can apply the same argument as above and it follows from (7) that

$$\text{Pow}_{AS} \rightarrow \Pi(t_{AS}^*) \cdot F_1(s) \cdot t_{AS}^* \cdot \frac{1}{\Pi(1)} = \frac{t_{AS}^* \Pi(t_{AS}^*) F_1(s)}{\Pi(1)}.$$

□

## References

- Barber, R. F., & Candès, E. J. (2015). Controlling the false discovery rate via knockoffs. *The Annals of Statistics*, 43(5), 2055–2085.
- Li, A., & Barber, R. F. (2015). Accumulation tests for fdr control in ordered hypothesis testing. *arXiv preprint arXiv:1505.07352*.
